# Supplementary material
Source: PubMed Central journal article supplement (PMC4412162)
Supplement: NIHMS680334-supplement-Supplemental_1.pdf [file NIHMS680334-supplement-Supplemental_1.pdf]

## 2 Materials

### 2.1 Solutions

1. Ammonium acetate (10 M).
2. 100 % Ethanol.
3. 1×TBE buffer (89 mM Tris base, 89 mM boric acid, 2 mM EDTA).

### 2.2 Enzymes, Reagents, Equipment

1. Trizol (Life Technologies).
2. Dynal Beads (dT)<sub>25</sub> (Life Technologies).
3. 10× RNA Fragmentation Buffer (10× Fragmentation Reagent, Life Technologies).
4. 10× Stop Buffer (10× Stop Solution, Life Technologies).
5. 6× DNA Loading Dye (Thermo Scientific).
6. Glycogen (Life Technologies).
7. RNaseOUT (Life Technologies).
8. Superscript III reverse transcriptase (Life Technologies).

9. QIAquick PCR purification kit (Qiagen).
10. Phusion DNA polymerase (New England Biolabs).
11. 25 bp DNA ladder (Promega).
12. QIAquick Gel Extraction kit (Qiagen).
13. NanoDrop 1000 (Thermo Scientific).
14. PCR Thermal Cycler (Eppendorf).

### **2.3 Primer Sequences**

HITS-5':

CGGTCTCGGCATTCCCTGCTGAACCGCTCTTCCGATCTr  
(GGG).

HITS-3':

ACACTCTTTCCCTACACGACGCTCTTCCGATCTTTTTT  
TTTTTTTTTTTTTTVN (V:A/C/G; N:A/T/C/G).

PE 1.0:

AATGATACGGCGACCACCGAGATCTACACTCTTTCCC  
TACACGACGCTCTTCCGATCT.

PE 2.0:

CAAGCAGAAGACGGCATAACGAGATCGGTCTCGGCAT  
TCCTGCTGAACCGCTCTTCCGATCT.

PAS-seq:

ACACTCTTTCCCTACACGACGCTCTTCCGATCTTTTTT  
TTTTTTTTTTTTTTT.

---

## **3 Methods**

### **3.1 Poly(A+) RNA Purification**

1. Purify total RNAs from cells/tissues using Trizol or other reagent as per manufacturer's instructions.
2. Purify poly(A+) RNAs from total RNAs using Dynal Beads (dT)<sub>25</sub> as per manufacturer's instructions.

### **3.2 Poly(A+) RNA Fragmentation**

1. Prepare the following mixture:
  - 9 µl poly(A+) RNA (0.5–1 µg).
  - 1 µl 10× RNA fragmentation buffer.
 Incubate at 70 °C for 10 min (minutes).
2. Add 1 µl STOP buffer (10×), and leave on ice for 2 min.
3. Add:
  - 190 µl H<sub>2</sub>O.
  - 50 µl ammonium acetate (10 M).
  - 750 µl 100 % ethanol.

0.5  $\mu\text{l}$  glycogen (20  $\mu\text{g}/\mu\text{l}$ ).

Incubate on dry ice for 10 min, and spin at top speed in a microfuge for 15 min at 4 °C.

4. Rinse the pellet with 70 % ethanol, air-dry the pellet, and resuspend it in 22  $\mu\text{l}$  of  $\text{H}_2\text{O}$ .

### **3.3 Reverse Transcription (RT)**

1. Prepare the following mixture:

22  $\mu\text{l}$  RNA.

2  $\mu\text{l}$  HITS-3' (12  $\mu\text{M}$ ).

2  $\mu\text{l}$  dNTP mix (10 mM).

Incubate at 65 °C for 5 min and then on ice for 5 min.

2. Add:

8  $\mu\text{l}$  5 $\times$  First-strand reverse transcriptase buffer.

2  $\mu\text{l}$  DTT (0.1 M).

2  $\mu\text{l}$  HITS-5' (10  $\mu\text{M}$ ).

2  $\mu\text{l}$  RNaseOUT (40 U/ $\mu\text{l}$ ).

2  $\mu\text{l}$  Superscript III reverse transcriptase (200 U/ $\mu\text{l}$ ).

Incubate at 50 °C for 30 min, then 42 °C for 30 min, and 90 °C for 5 min, and cool down to room temperature.

### **3.4 First-Round PCR Amplification of cDNAs**

1. Add 60  $\mu\text{l}$  of  $\text{H}_2\text{O}$  to the 40  $\mu\text{l}$  RT reaction, and isolate cDNAs using the QIAquick PCR purification kit. Elute cDNA from the column with 40  $\mu\text{l}$  of  $\text{H}_2\text{O}$ .

2. Prepare the following PCR mixture (50  $\mu\text{l}$  total volume):

36.4  $\mu\text{l}$  cDNA.

10  $\mu\text{l}$  5 $\times$  High-fidelity phusion polymerase buffer.

1  $\mu\text{l}$  PE-1.0 primer (12  $\mu\text{M}$ ).

1  $\mu\text{l}$  PE-2.0 primer (12  $\mu\text{M}$ ).

1  $\mu\text{l}$  dNTP mix (10 mM).

0.5  $\mu\text{l}$  High-fidelity phusion polymerase (2 U/ $\mu\text{l}$ ).

Run the following PCR program:

1. 98 °C 30 s.

2. 98 °C 10 s.

3. 60 °C 30 s.

4. 72 °C 30 s.

5. Go to **step 2** twice.

6. 72 °C 5 min.

7. 4 °C HOLD.

### 3.5 Size Selection of cDNAs

1. Add 10  $\mu$ l of 6 $\times$  DNA loading dye to the PCR reaction, and run the above PCR reaction on a 2 % agarose gel.
2. Cut out 200–300 bp band.
3. Extract DNA using QIAquick Gel Extraction kit, and elute DNA from the columns with 40  $\mu$ l H<sub>2</sub>O.

### 3.6 Second-Round PCR Amplification of cDNA Fragments

1. Prepare the following PCR mixture (50  $\mu$ l total volume):
  - 36.5  $\mu$ l cDNA (eluate from the previous step).
  - 10  $\mu$ l 5 $\times$  High-fidelity Phusion polymerase buffer.
  - 1  $\mu$ l PE-1 primer (12  $\mu$ M).
  - 1  $\mu$ l PE-2 primer (12  $\mu$ M).
  - 1  $\mu$ l dNTP mix (10 mM).
  - 0.5  $\mu$ l High-fidelity phusion polymerase (2 U/ $\mu$ l).

Run PCR program:

1. 98 °C 30 s.
  2. 98 °C 10 s.
  3. 65 °C 30 s.
  4. 72 °C 30 s.
  5. Go to **step 2** 14 times.
  6. 72 °C 5 min.
  7. 4 °C HOLD.
2. Purify DNA using QIAquick PCR purification kit.
  3. Run 10 % of the PCR product on a 2 % agarose gel to examine the size. A typical gel picture of the library is shown in Fig. 1.
  4. Measure the DNA concentration using a Nanodrop spectrophotometer, and adjust the concentration according to the requirement of your sequencing facility.
  5. Submit the library for sequencing on an Illumina Genome Analyzer or Hi-Seq using a custom sequencing primer (PAS-seq).

### 3.7 Bioinformatic Analysis

1. The PAS-seq raw reads are first trimmed by removing Ts from the beginning of the reads.
2. The remaining sequences are mapped to the proper reference genome using Bowtie with the setting (-n 2 -m 1 -s 1) (up to two nucleotide mismatches and one unique match to the reference genome allowed) [13].
3. To address the internal poly(A) priming issue, mapped reads that have six or more consecutive As or seven As in total within the ten nucleotides downstream of mapped poly(A) junction are removed.

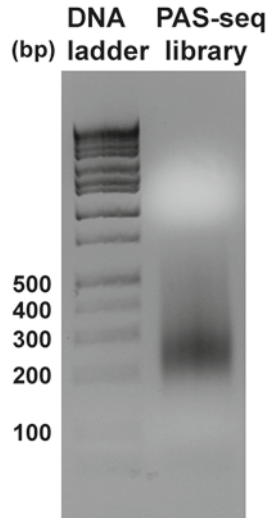

**Fig. 1** PAS-seq library. 10 % of the second-round PCR reaction (Subheading 3.6) is resolved on a 2 % agarose gel to check the size of DNA fragments

4. PASs that are found within 40 nt of one another are likely due to heterogeneity of the cleavage reaction and are thus pooled together, and the weighed average position of all the PASs are designated as the final PAS. This process is repeated iteratively until there is no more PAS found within 40 nt.
5. For further bioinformatics analysis, please refer to references 9–11, 14.

---

#### 4 Trouble-Shooting Tips

1. It is important to purify the cDNAs after the RT step and remove unused RT primers. Otherwise the RT primers may be used in the PCR amplification, and produce DNAs with incomplete linker sequences.
2. The purpose for the first short PCR step is to convert cDNAs into double-stranded DNAs. Gel purification helps to make sure that the DNAs are relatively homogenous in size, therefore minimizing the possible amplification bias.
3. Be extra careful with each DNA purification step. Maximize the recovery by eluting twice.
4. The low-cycle-number PCR is important for quantification. If the starting RNA amount is low, PCR cycle number may be increased to obtain the necessary DNA amount. However this may negatively influence the quantification performance.
5. If sequencing using the custom primer is not possible at your sequencing facility, one can change the orientation of the

library by redesigning the primer sequences such as sequencing reads start at the 5' end of the corresponding RNA sequence and read into the poly(A) tail. For this approach, we usually gel purify 175–225 bp DNA fragments and perform single-end 100 nt sequencing.

6. PAS-seq can be used for digital gene expression profiling (DEG) analysis. RNA-seq, one of the most commonly used methods for DEG analysis, relies on the average read counts over the entire genes for quantification. As each mRNA has only one 3' end, PAS-seq and related methods should be at least as accurate as RNA-seq for DEG analysis [14].

---

## Acknowledgements

This work was supported by National Institutes of Health Grant R01 GM090056 and American Cancer Society Grant RSG-12-186.

## References

1. Shi Y (2012) Alternative polyadenylation: new insights from global analyses. *RNA* 18: 2105–2117
2. Di Giammartino DC, Nishida K, Manley JL (2011) Mechanisms and consequences of alternative polyadenylation. *Mol Cell* 43:853–866
3. Sandberg R, Neilson JR, Sarma A et al (2008) Proliferating cells express mRNAs with shortened 3' untranslated regions and fewer microRNA target sites. *Science* 320: 1643–1647
4. Flavell SW, Kim TK, Gray JM et al (2008) Genome-wide analysis of MEF2 transcriptional program reveals synaptic target genes and neuronal activity-dependent polyadenylation site selection. *Neuron* 60:1022–1038
5. Ji Z, Lee JY, Pan Z et al (2009) Progressive lengthening of 3' untranslated regions of mRNAs by alternative polyadenylation during mouse embryonic development. *Proc Natl Acad Sci U S A* 106:7028–7033
6. Oszolak F, Kapranov P, Foissac S et al (2010) Comprehensive polyadenylation site maps in yeast and human reveal pervasive alternative polyadenylation. *Cell* 143:1018–1029
7. Oszolak F, Milos PM (2011) RNA sequencing: advances, challenges and opportunities. *Nat Rev Genet* 12:87–98
8. Jan CH, Friedman RC, Ruby JG et al (2010) Formation, regulation and evolution of *Caenorhabditis elegans* 3'UTRs. *Nature* 469: 97–101
9. Shepard PJ, Choi E, Lu J et al (2011) Complex and dynamic landscape of RNA polyadenylation revealed by PAS-Seq. *RNA* 17:761
10. Fox-Walsh K, Davis-Turak J, Zhou Y et al (2011) A multiplex RNA-seq strategy to profile poly(A+) RNA: application to analysis of transcription response and 3' end formation. *Genomics* 98:266–271
11. Fu Y, Sun Y, Li Y et al (2011) Differential genome-wide profiling of tandem 3' UTRs among human breast cancer and normal cells by high-throughput sequencing. *Genome Res* 21:741–747
12. Zhu YY, Machleder EM, Chenchik A et al (2001) Reverse transcriptase template switching: a SMART approach for full-length cDNA library construction. *Biotechniques* 30:892–897
13. Langmead B, Trapnell C, Pop M et al (2009) Ultrafast and memory-efficient alignment of short DNA sequences to the human genome. *Genome Biol* 10:R25
14. Derti A, Garrett-Engele P, Macisaac KD et al (2012) A quantitative atlas of polyadenylation in five mammals. *Genome Res* 22:1173–1183
